# Supplementary material for: Protocatechuic aldehyde acts synergistically with dacarbazine to augment DNA double-strand breaks and promote apoptosis in cutaneous melanoma cells
Source: Springer Nature journal article supplement (doi:10.1186/s12906-023-03933-w), 2023-04-06

**Figure 2C**

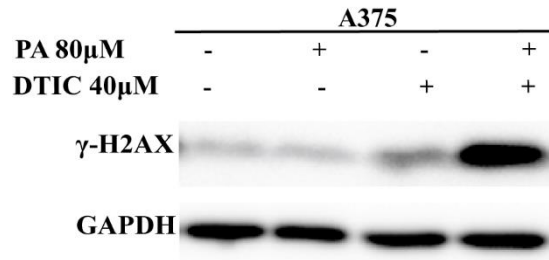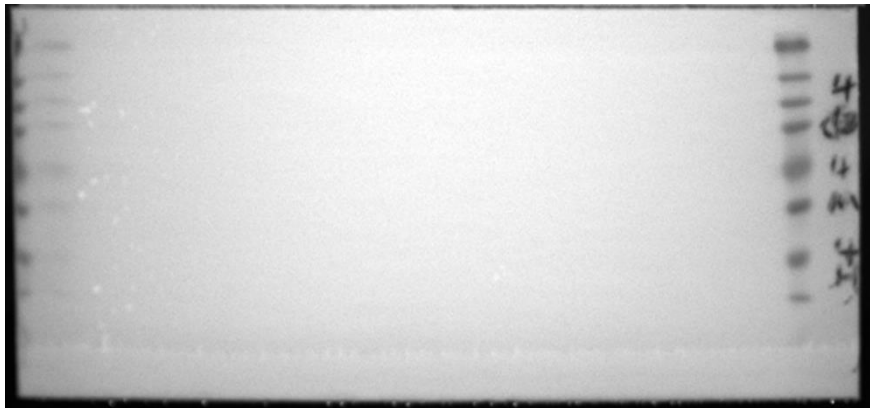

$\gamma$ -H2AX

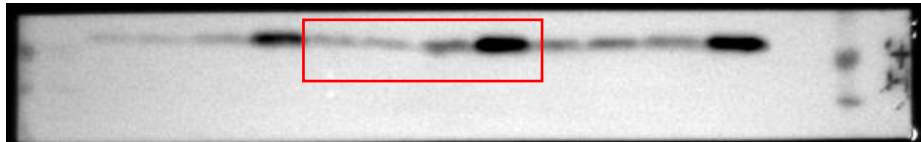

GAPDH

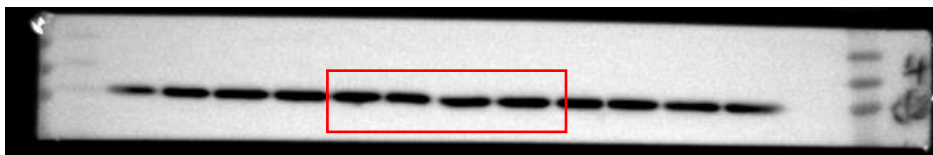

**Figure 2C**

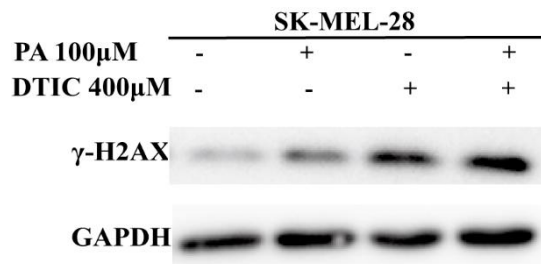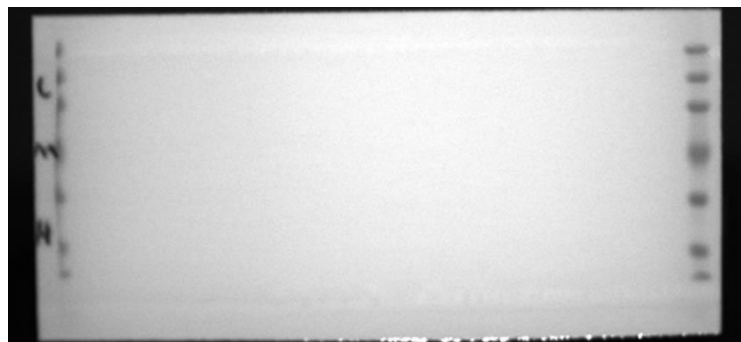

$\gamma$ -H2AX

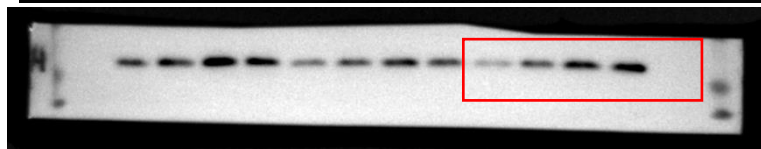

GAPDH

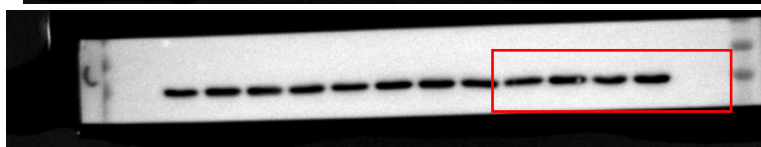

**Figure 2G**

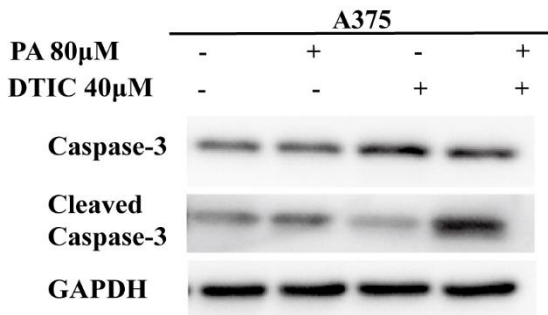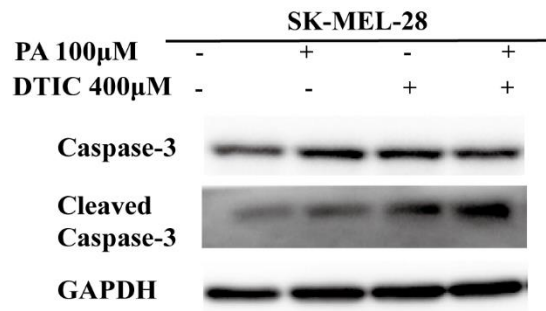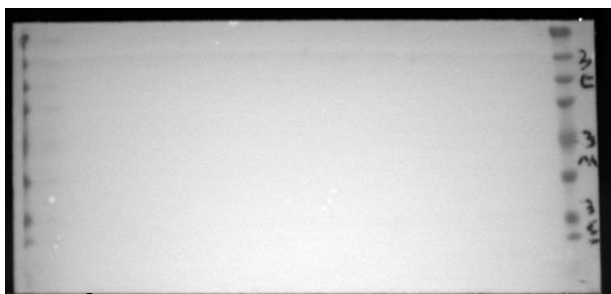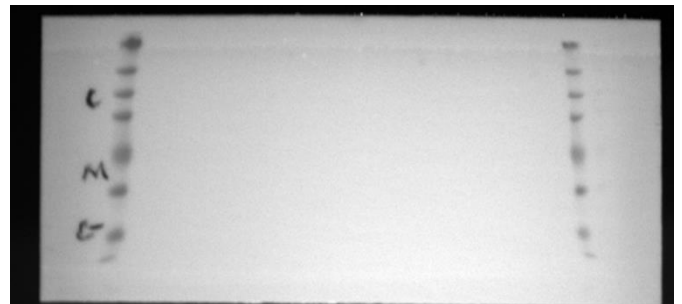

Caspase-3

Caspase-3

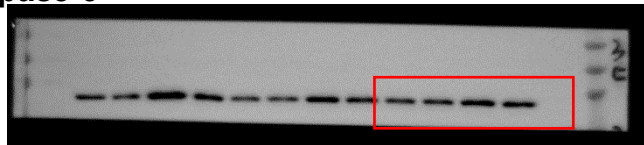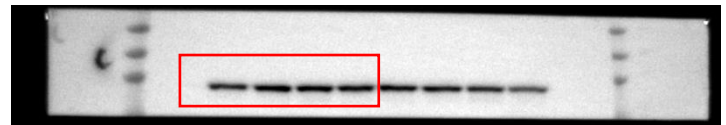

Cleaved Caspase-3

Cleaved Caspase-3

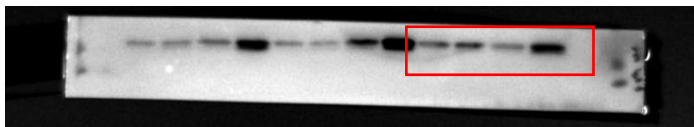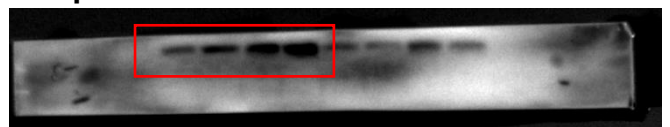

GAPDH

GAPDH

**Figure 3A**

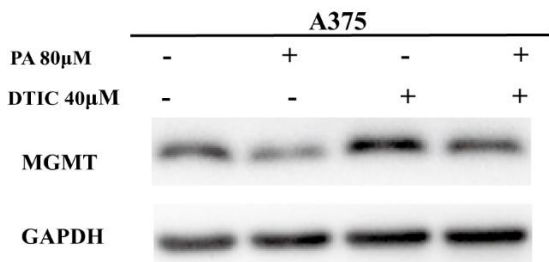

MGMT

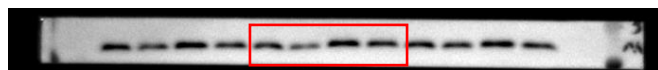

GAPDH

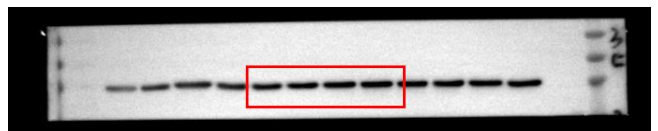

**Figure 3B**

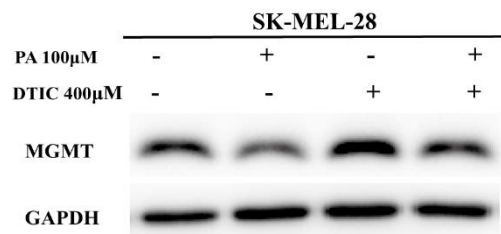

MGMT

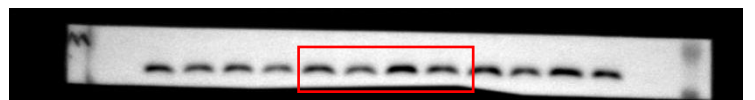

GAPDH

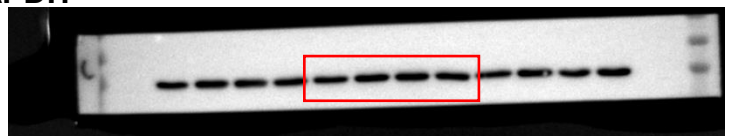

**Figure 3D**

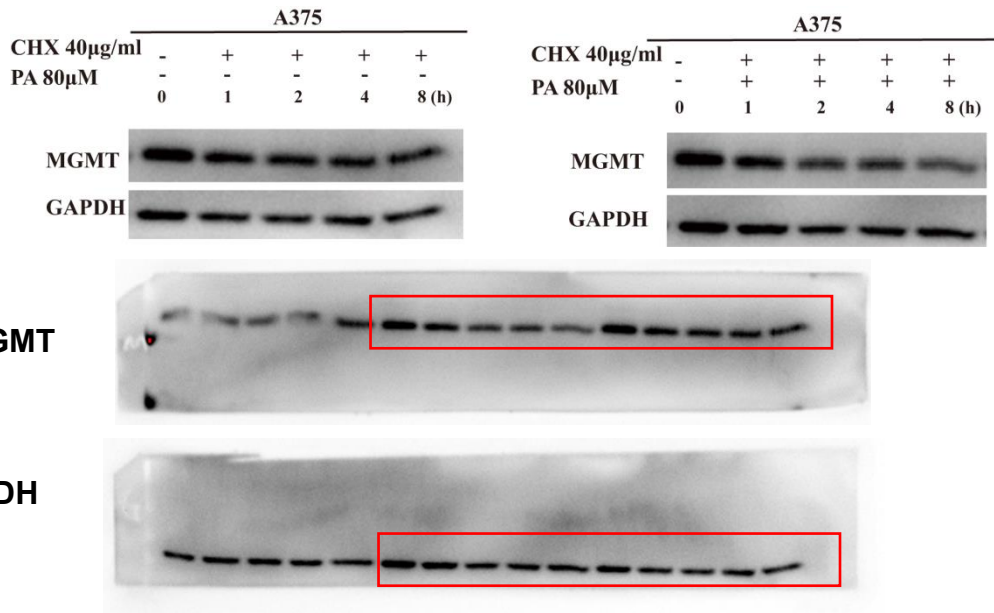

**Figure 3E**

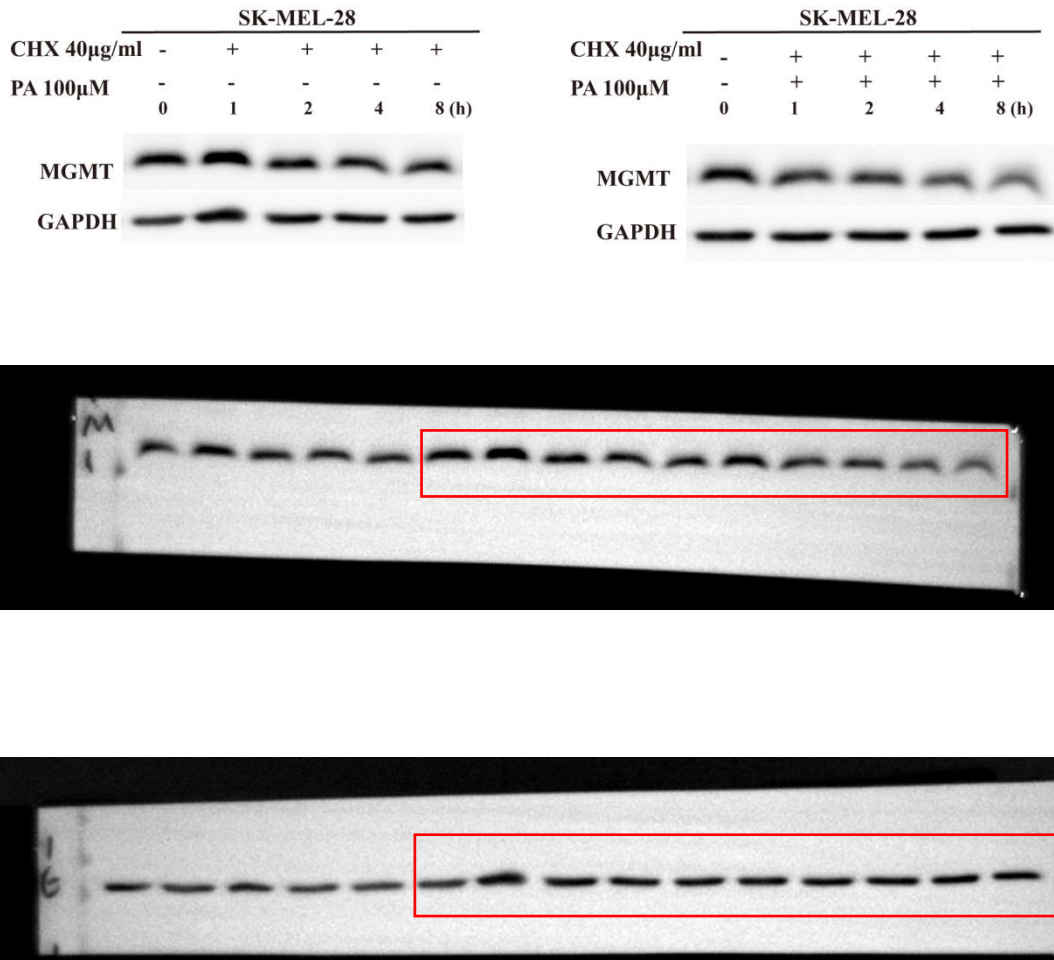

**Figure 3F**

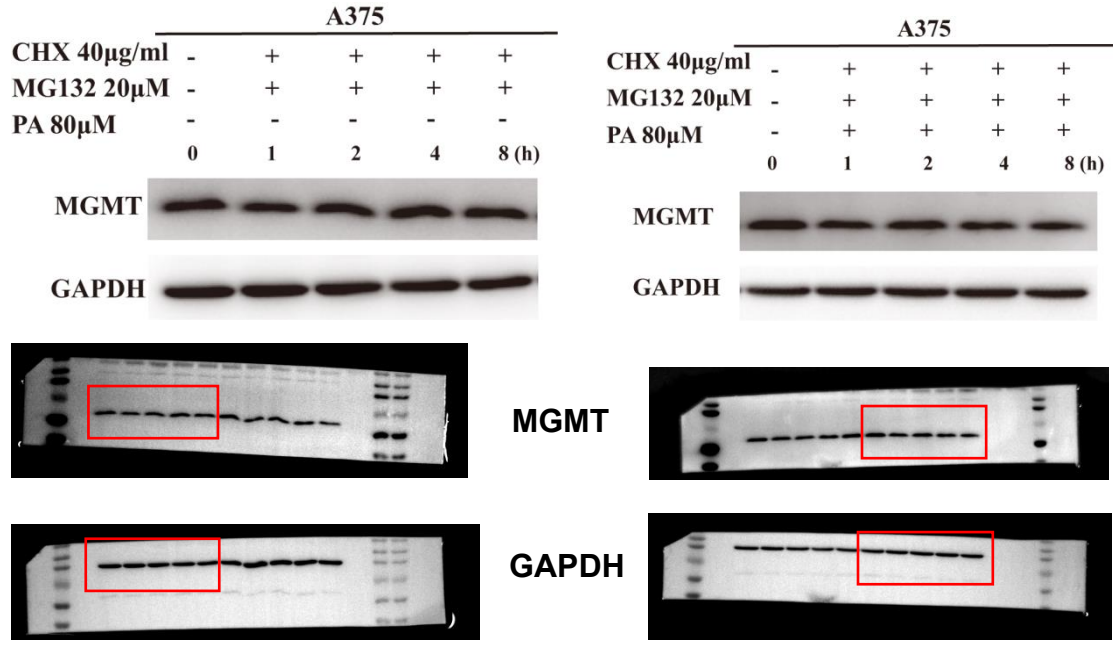

**Figure 3G**

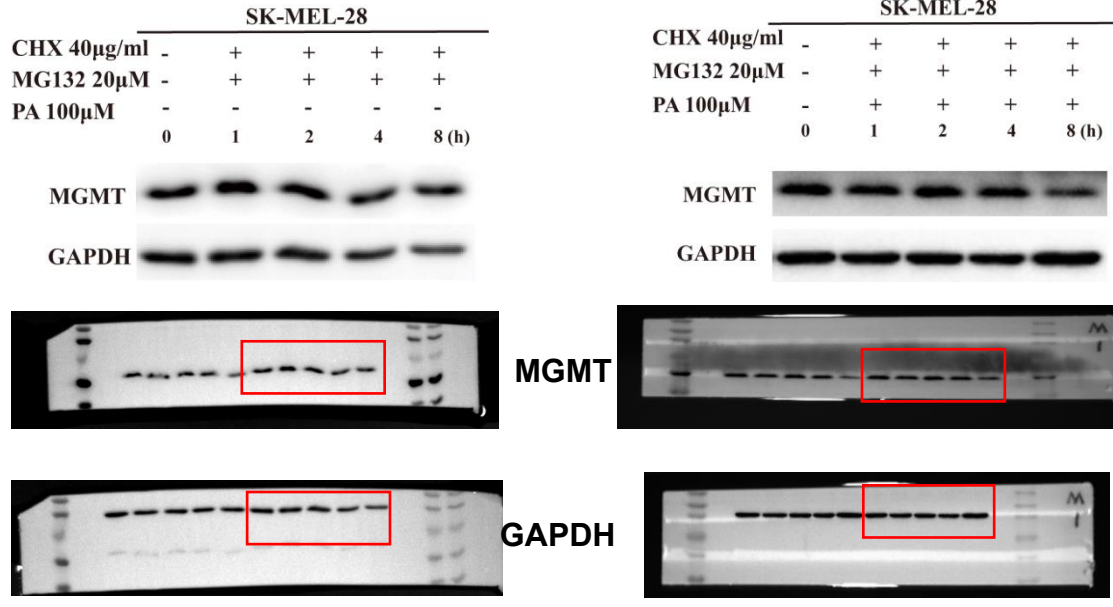

**Figure 4A**

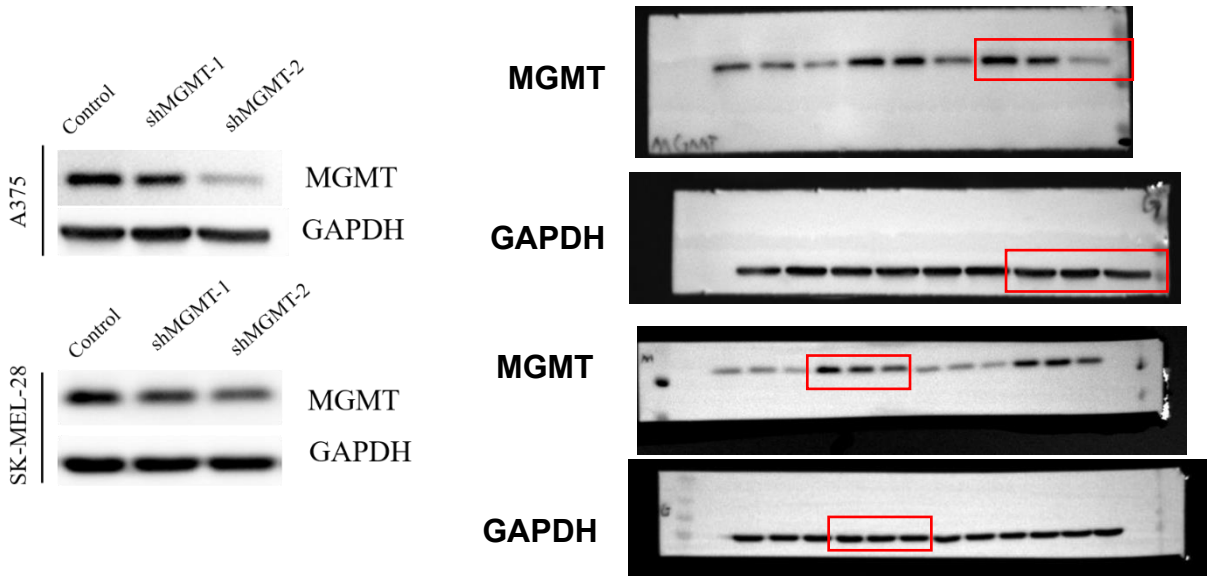

Supplement: MOESM1 [file 25216774]
